# Supplementary material for: Computational Pipeline for Reference-Free Comparative Analysis of RNA 3D Structures Applied to SARS-CoV-2 UTR Models
Source: MDPI journal article supplement (doi:10.3390/ijms23179630), 2022-08-25
Supplement: s1 [file s1]

Table S2a. RNA 3D models of SARS-CoV-2 5'-UTR with entanglements. For each model, the types of entanglements are given.

| 3D RNA model         | Simple entanglements | Higher-order entanglements |
|----------------------|----------------------|----------------------------|
| 5UTR                 |                      |                            |
| 5UTR-Bujnicki-02.pdb |                      | L(D), L(S)                 |
| 5UTR-Bujnicki-05.pdb |                      | L(D)                       |
