# Supplementary material for: Computational Pipeline for Reference-Free Comparative Analysis of RNA 3D Structures Applied to SARS-CoV-2 UTR Models
Source: MDPI journal article supplement (doi:10.3390/ijms23179630), 2022-08-25
Supplement: s1 [file s1]

Table S2b. RNA 3D models of SARS-CoV-2 3'-UTR with entanglements. For each model, the types of entanglements are given.

| 3D RNA model         | Simple entanglements | Higher-order entanglements |
|----------------------|----------------------|----------------------------|
| 3UTR                 |                      |                            |
| no_PK                |                      |                            |
| 3UTR-Bujnicki-03.pdb | L(L), L(D)           |                            |
| 3UTR-Bujnicki-04.pdb | L(L), L(D)           |                            |
| 3UTR-Bujnicki-05.pdb | L(L), L(D) , L(D)    |                            |
| 3UTR-Ding_7.pdb      | L(L) , L(D)          |                            |
| PK                   |                      |                            |
| 3UTR-Chen-2_1.pdb    |                      | L(S)                       |
| 3UTR-Chen-2_2.pdb    | L(S)                 | L(S)                       |
| 3UTR-Chen-2_3.pdb    | L(S)                 | L(S)                       |
| 3UTR-Chen-2_4.pdb    | L(S)                 | L(S)                       |
| 3UTR-Chen-2_5.pdb    | L(S)                 | L(S)                       |
| 3UTR-Das-01_1.pdb    | L(S)                 | L(S)                       |
| 3UTR-Das-02_1.pdb    | L(S)                 | L(S)                       |
| 3UTR-Das-03_1.pdb    |                      | L(D), L(D), L(S)           |
| 3UTR-Das-04_1.pdb    | L(S)                 | L(S)                       |
| 3UTR-Das-05_1.pdb    | L(S)                 | L(S)                       |
| 3UTR-Das-06_1.pdb    | L(S)                 | L(S)                       |
| 3UTR-Das-07_1.pdb    | L(S)                 | L(S)                       |
| 3UTR-Das-08_1.pdb    | L(S)                 | L(S)                       |
| 3UTR-Das-09_1.pdb    | L(S)                 | L(S)                       |
| 3UTR-Das-10_1.pdb    | L(S)                 | L(S)                       |
